# Supplementary material
Source: PubMed Central journal article supplement (PMC7606748)
Supplement: NIHMS1629956-supplement-3.pdf [file NIHMS1629956-supplement-3.pdf]

**Supplemental Materials for: Kempen, et al** “Incidence and outcome of uveitic glaucoma in eyes with intermediate, posterior or panuveitis followed up to 10 years after randomization to fluocinolone acetonide implant or systemic therapy.”

**Supplement Table of Contents.....Page 1**

**Supplemental Table. Sensitivity Analyses: Comparison of the influence of using alternative methods of treating missing data for IOP in regression of time-to-glaucoma, among eyes with uveitis in the Multicenter Uveitis Steroid Treatment (MUST) Trial and Follow-up Study.....Page 2**

**Supplemental Figure 1. “CONSORT” diagram. Follow-up for incidence and outcome of glaucoma among eyes with uveitis in the Multicenter Uveitis Steroid Treatment (MUST) Trial and Follow-up Study.....Page 3**

**Supplemental Figure 2. Incidence of Glaucoma over Time by As-Treated Treatment Group among eyes with uveitis in the Multicenter Uveitis Steroid Treatment (MUST) Trial and Follow-up Study....Page 4**

**Supplemental Figure 3. Comparison of outcomes of glaucoma by treatment group, as-treated (implant vs. systemic therapy).....Page 5**

**Appendix: Members of the Multicenter Uveitis Steroid Treatment (MUST) Trial and Follow-up Study Research Group. ....Page 6**

**Supplemental Table. Sensitivity Analyses: Comparison of the influence of using alternative methods of treating missing data for IOP in regression of time-to-glaucoma, among eyes with uveitis in the Multicenter Uveitis Steroid Treatment (MUST) Trial and Follow-up Study**

| Model            | Complete Case* |       |        | Last Value Carried Forward† |       |        | Multiple Imputation‡ |       |        |
|------------------|----------------|-------|--------|-----------------------------|-------|--------|----------------------|-------|--------|
|                  | No. Eye-visit  | Tx RR | P      | No. Eye-visit               | Tx RR | P      | No. Eye-visit        | Tx RR | p      |
| Tx <sup>¶</sup>  | 6832           | 5.90  | <0.001 | 8292                        | 5.90  | <0.001 | 8292                 | 5.90  | <0.001 |
| Tx + iop(BL)     | 6821           | 5.83  | <0.001 | 8280                        | 5.81  | <0.001 | 8280                 | 5.81  | <0.001 |
| Tx + iop(t)      | 6832           | 5.06  | <0.001 | 8291                        | 5.09  | <0.001 | 8292                 | 5.10  | <0.001 |
| Tx + mean iop(t) | 6832           | 3.64  | <0.001 | 8292                        | 3.62  | <0.001 | 8292                 | 4.08  | <0.001 |
| Tx + max iop(t)  | 6832           | 3.12  | 0.001  | 8291                        | 3.07  | <0.001 | 8291                 | 3.07  | <0.001 |

\*Implant: 77 events out of 196 eyes; Systemic: 16 events out of 209 eyes

†Implant: 79 events out of 196 eyes; Systemic: 17 events out of 209 eyes

¶Tx=treatment group (implant vs. systemic therapy); RR=relative risk.

**Supplemental Figure 1. “CONSORT” diagram. Follow-up for incidence and outcome of glaucoma among eyes with uveitis in the Multicenter Uveitis Steroid Treatment (MUST) Trial and Follow-up Study**

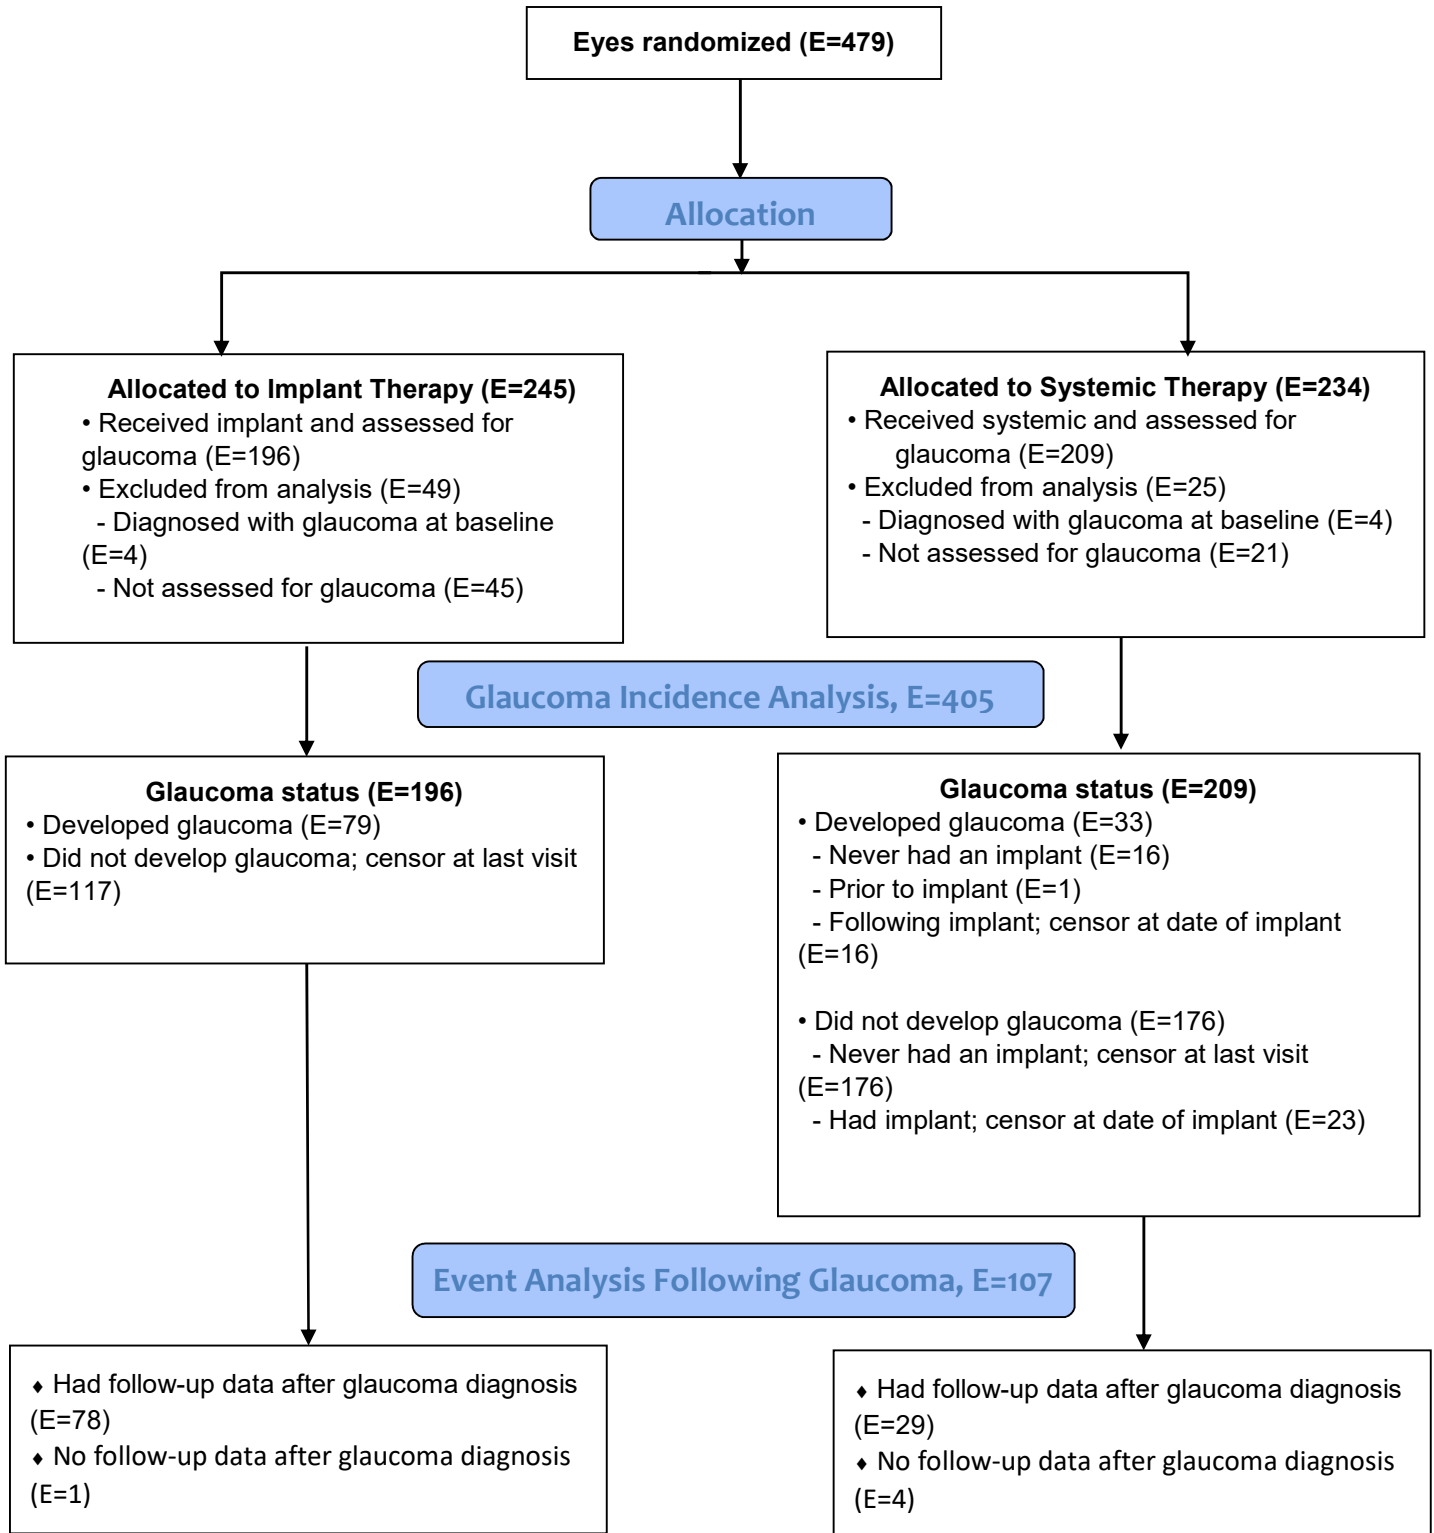

**Supplemental Figure 2. Incidence of Glaucoma over Time by As-Treated Treatment Group among eyes with uveitis in the Multicenter Uveitis Steroid Treatment (MUST) Trial and Follow-up Study**

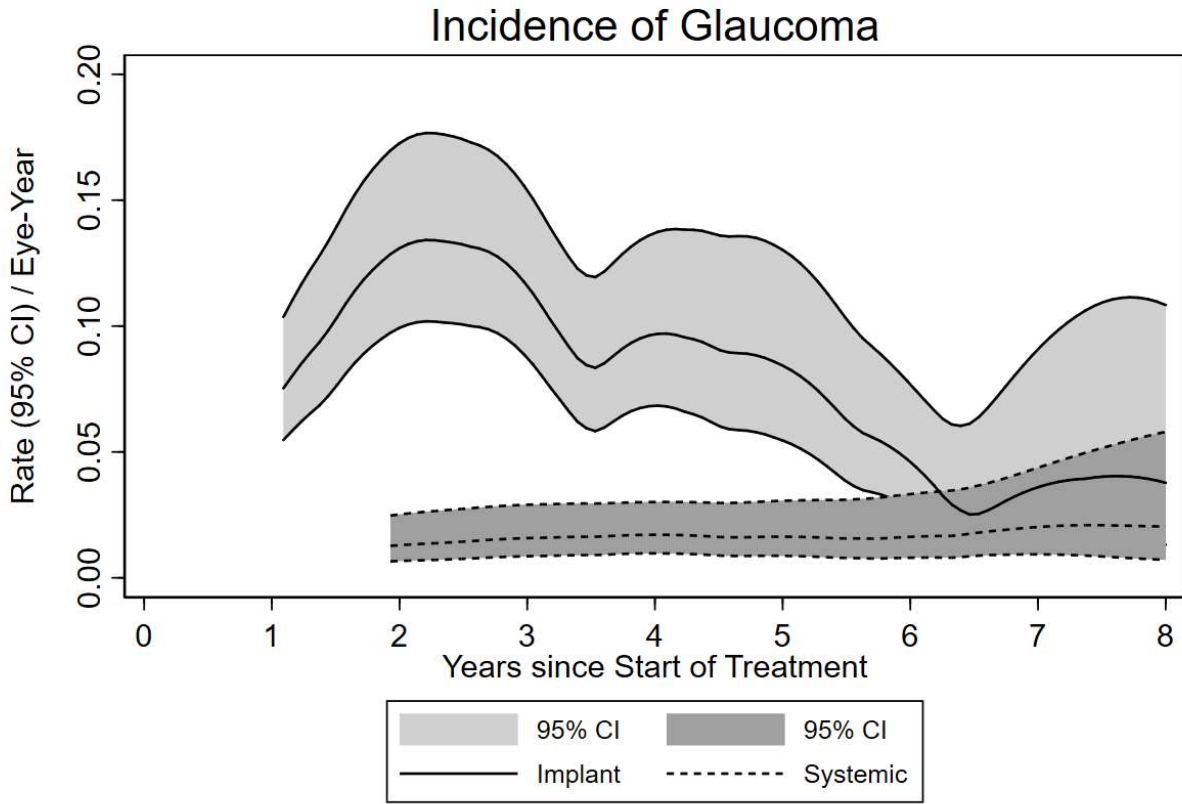

Note: Years since Start of Treatment truncated at 8 years

**Supplemental Figure 3: Comparison of outcomes of glaucoma by treatment group, as-treated (implant vs. systemic therapy).** Tx=Treatment [Implant (IMP) vs Systemic (SYS), as-treated]; IOP=intraocular pressure. Negative numbers on the x-axis refer to years before diagnosis with glaucoma, positive numbers refer to years since glaucoma diagnosis in the given eye.

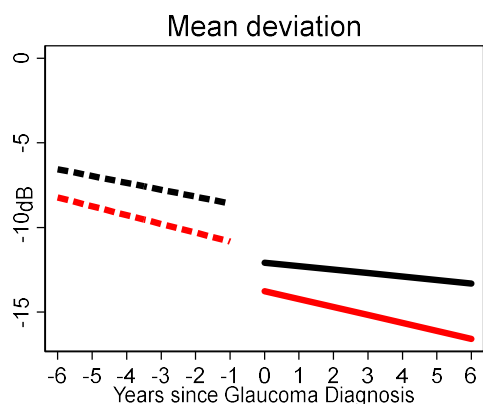

Tx group difference before dx: intercept(p=0.51); slope(p=0.33)  
 Tx group difference after dx: intercept(p=0.66); slope(p=0.75)

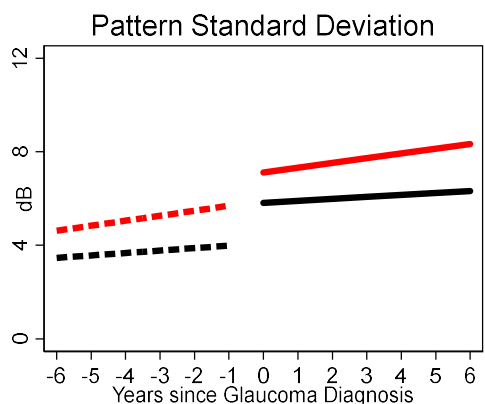

Tx group difference before dx: intercept(p=0.05); slope(p=0.28)  
 Tx group difference after dx: intercept(p=0.14); slope(p=0.47)

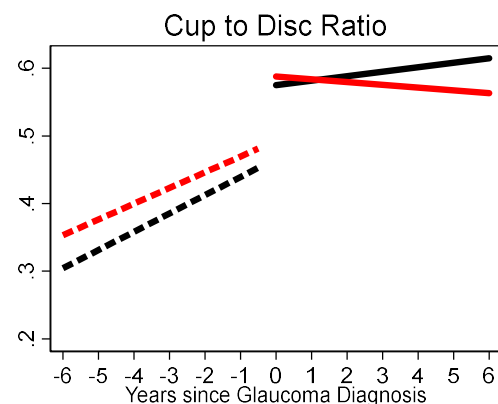

Tx group difference before dx: intercept(p=0.56); slope(p=0.73)  
 Tx group difference after dx: intercept(p=0.67); slope(p=0.80)

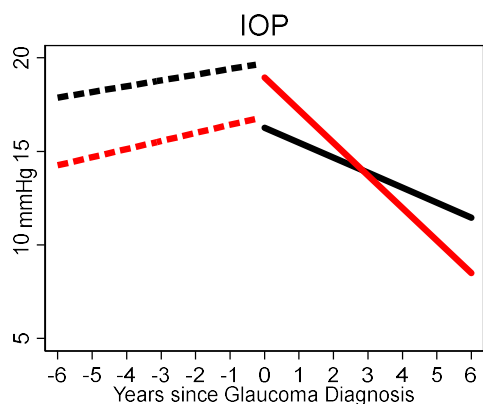

Tx group difference before dx: intercept(p=0.10); slope(p=0.33)  
 Tx group difference after dx: intercept(p=0.04); slope(p=0.09)

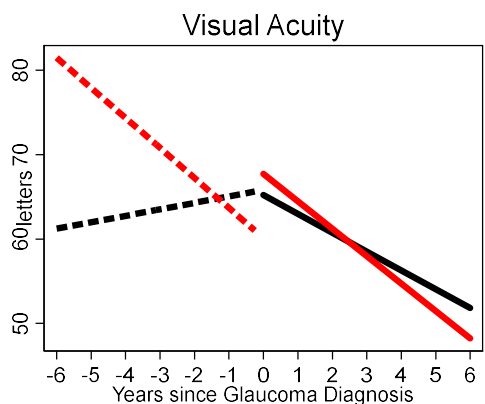

Tx group difference before dx: intercept(p=0.95); slope(p=0.70)  
 Tx group difference after dx: intercept(p=0.89); slope(p=0.07)

## **CREDIT ROSTER:**

### **Multicenter Uveitis Steroid Treatment (MUST) Trial and Follow-up Study Research Group**

Last updated, April 26, 2018

**Duke Eye Center, Durham, NC:** Glenn J. Jaffe, MD (Director); Christina F. Bunn; LaToya Greene; Dilraj Grewal, MD; Sean Grout; Michael Hughes; Ryan Imperio; Michael P. Kelly; Brian Lutman; Paola Perez.

**Emory University, Atlanta, GA:** Steven Yeh, MD (Director); Jannah Dobbs; Alcides Fernandes, MD; Deborah Gibbs, COMT, CCRC; Donna Leef, MMSc, COMT; Kelly Mazur; Ghazala O'Keefe, MD; Rhonda Waldron, BS, MMSc.

**Johns Hopkins University, Baltimore, MD:** Jennifer E Thorne, MD, PhD (Director); Olukemi Adeyemo; Joseph Belz; Meghan Berkenstock, MD; Jeff Boring, COA; Bryn Burkholder, MD; Dennis Cain; Eric Crowell, MD, MPH; Russ Distler; David Emmert; Janis R. Graul; Charles Mark Herring; Pat Hines; Dana Hornbeak, MD; Irfan Khan, MD; Jacquelyn McDonald; Kelly Miller, COA; Robert Moore; Antonia Nwankwo, COA; Chinwenwa Okeagu, MD; Ashvini Reddy, MD; Terry L. Reed, COA; Nicholas Rhoton; Amde S. Shifera, MD, PhD.

**Massachusetts Eye and Ear Infirmary, Boston, MA:** George Papaliodis, MD; Steven Bennett; Sarah Brett; Lisa Dennehy; Erica D'Souza ; Matthew DiRocco; Ellen Fitzgerald ; John Head ; John Hensel; Mansab Jafri ; Anneliese Koleber ; Tuyen Nguyen; Milka Nova; Abdulrahman Rageh; John Romano; Lucia Sobrin, MD; Lynn Sullivan; Megan Thompson; Kathleen Warren; Iris Wen.

**Mayo Clinic, Rochester, MD:** Wendy Smith, MD (Director); Mario Ayers; Jean Burrington; Shannon Goddard; Daniel Hamiel; Anita Hermanson; Shannon Howard; Zbigniew Krason; Jessica Morgan; Joan Overend; Heidi Rubin; Jane Sultze; Jamie Tesmer.

**McGill University, Montreal, Quebec:** Jean Deschenes, MD (Director); Carolina Ararat; Isabelle Delpech; Lianne Marcon; Karin Marianna Oliver, MD; Patricia Sorya; Emiko Vervroegen-Inoue; Debbie Williams.

**Moorfields Eye Hospital, London, UK:** Susan Lightman, MD, PhD (Director); Ahmed Al-Janabi, MD; Julitiana Baltinas; Rose Gilbert, MBBS, MRCOphth; Dimitrios Ladas MD; Rebecca Shields; Iazha Talat, MD; Anastasia Tasiopoulou MD; Oren Tomkins-Netzer; Sophia Zagora, MD.

**National Eye Institute, Bethesda, MD:** H. Nida Sen, MD, MHSc (Director); Mike Arango; Matt Atkinson; Faith Chen, BSN, RN; Denise Cunningham, CRA; Darryl Hayes, COA; Dessie Koutsandreas, BS, COA; Rob Mays; Leanne Reuter, COA; Patti Sherry, MSHS, BSN, CCRP.

**New York Eye & Ear Infirmary, New York, NY:** Paul A. Laskany, MD (Director); Maya Ben-Zeev; Corinne Coonan; Andrea Honda, MD; Monica Lorenzo-Laskany, MD; Robert Masini; Azinda Morrow.

**Northwestern University:** Debra A. Goldstein, MD (Director); Maritza Barragan, AS; Andrea Birnbaum, MD, PhD; Natalia Brooks; Gemma De la Rosa, BHS, COT; Anjum Koreishi, MD; Sharnia Lashley, MS; Cason Moore; Mia Quintana, AS; Carmen Ramirez; Nicole Seddon, BS; Evica Simjanowski, CRA; Mariner Skelly; Catherine Thuruthumaly, MD; Mei Zhou.

**Ophthalmic Consultants of Boston, Boston, MA:** Lana Rifkin, MD (Director); Joanne Berry; Amanda Campbell; Dennis Donovan; Marissa M. Giel; Margaret Graham; Mike Jones; Jennifer Kruger.

**Retina Consultants of Houston:** Rosa Y. Kim, MD (Director); Belinda Almanza; Matthew S. Benz, MD; David M. Brown, MD; Eric Chen, MD; Marie Chin; Cassandra Cone; Richard H. Fish, MD; Christopher Henry, MD; Eric Kegley, BA, CRA, COA; Nubia Landaverde; James C. Major, Jr., MD; Chelsey Moore; Beau Richter; Amy C. Scheffler, MD; Laura Shawver; Robert Smith; Veronica A. Sneed; Cary Stoeber; Tien P. Wong, MD; Charles C. Wykoff, MD.

**Royal Victorian Eye & Ear Hospital, East Melbourne, Australia:** Richard J. Stawell, MD (Principal Investigator); Thuy Chau; Xavier Fagan, MD; Rathika Kandasamy, MD; Lyndell Lim, MD; Ming-Lee Lin, MD; Cecilia Ling, MD; Dai Ni Ong, MD; Sutha Sanmugasundram; Robyn Troutbeck, MD; Ehud Zamir, MD.

**Rush University Medical Center, Chicago, IL:** Pauline T. Merrill, MD (Director); Elizabeth Atchison, MD; Carla Edwards, PhD, MPH; Mathew MacCumber, MD, PhD; Blanca Ornelas; Loreen Pappas; Len Richine; Brenda Rodriguez; Kisung Woo; John C. Zeyer, MD.

**University of California at Los Angeles, Los Angeles, CA:** Gary N. Holland, MD (Director); Robert D. Almanzor, COA; Meghan Berkenstock, MD; Jose Castellanos, COT; Orly Catz; Daniel Cordova; Lauren Eash; Martin Garcia, BS; Jean Pierre Hubschman, MD; Colin A. McCannel, MD; Ellen Pascual, BS; Pradeep S. Prasad, MD.

**University of California at San Francisco, San Francisco, CA:** Nisha Acharya, MD (Director); Thuy Doan, MD, PhD; John Gonzales, MD; Betty Hom; Mary Lew, BA; Sarah Lopez; Maya Rao, MPH; Jay Stewart, MD; Lina Zhong.

**University of Iowa, Iowa City, IA:** James Folk, MD (Director); Brice Critser, CRA; Maria C. Davis Hochstedler, BA; Lacy Flanagan, BA; Ian C. Han, MD; Mitchell J. Martin, BS; Christine A. Sinkey, BSN; Nasreen Syed, MD; Barbara K. Taylor, BBA; Toni Venckus, BA; Jean A. Walshire, AASc.

**University of Miami, Miami, FL:** Janet L. Davis, MD (Director); Jim Crowell; Giselle De Oliveira; Marcella Hicky; Carmen Huerta; Jennifer Johnson; Michael Kicak; Jaclyn Kovach, MD; Christiaan Lopez Miro; Daisy Monteagudo; Jim Oramas; Sira Padron; Stephen Schwartz, MD, MBA; Brandon Sparling; Richard R. Stanfield; Richard Vorperian.

**University of Michigan, Ann Arbor, MI:** Susan G. Elner, MD (Director); Pamela Campbell, COT, CCRP; Sonya Cosby; Timothy Costello; Linda Fournier, COT; Lindsay M. Godsey, MS, COA, CCRP; Linda Goings, BFA, CRA; Dena Harris; Moella Hesselgrave, COA; Munira Hussain, MS; K. Thiran Jayasundera, MD; Mathew Lawrence; Katherine Morehead; Robert Prusak, BA, CRA; Laura Rozek, COA; Anjali R. Shah, MD; Timothy J. Steffens, CRA; Laura Trebesh, CRA.

**University of Pennsylvania, Philadelphia, PA:** Nirali Bhatt, MD (Director); Mauricio Alvarez; James Berger; Dominique Caggiano; Judy Chen; Cheryl Devine; Joan C. DuPont; Andre Estanislau; Sheri Grand-Drossner, MSW; Matthew Henderson; Meghan Karlik; Sara Morales; Janice Petner; Tyrone Quarterman; Collin Russell; Adrienne Saludades. Former member: John H. Kempen, MD, PhD (Founding Director).

**University of Pittsburgh Medical Center, Pittsburgh, PA:** Andrew Eller, MD (Director); Natalie L. Anthony; Tyler M. Banash; Shane Belin, BS; Rhonda J. Dahlstrom, MA; Michael J. DeRosa, BS, BA; Thomas Friberg, MD; Denise S. Gallagher, MD; Chad Indermill, BS; Joseph N. Martel, MD; Caterina M. Massimino; Kathyryn L. Mentzer; Sharon A. Murajda-Jumba, BS; Tina L. Niggli; Jessica S. Toro; Melessa Salay, MPH; Amy M. Smith; Kristy Truman, COA; Gary L. Vagstad; Evan L. Waxman, MD.

**University of South Florida, Tampa, FL:** Peter R. Pavan, MD (Director); Ken Albritton; Swetangi Bhaleeya, MD; Sharon Charton; JoAnn Leto; Brian Madow, MD; Paula Russian; Scott E. Pautler, MD; Wyatt Saxon; Susan Scherouse.

**University of Utah, Salt Lake City, UT:** Albert Vitale, MD (Director); Susan Allman; Paul S. Bernstein, MD, PhD; Melissa Chandler; Kelliann Farnsworth; Katie J. Farnsworth, BS James Gilman, CRA; Deborah Harrison, MS, CCRC; Elizabeth Nuttall; Akbar Shakoor, MD; Becky Weeks, CRA; Kimberley Wegner, BS, CRC.



**University of Washington, Seattle, WA:** Russell Van Gelder, MD, PhD (Director); Ron Jones; James Leslie; Thellea Leveque, MD, MPH; Ian Luttrell; Frances Moses; Juli Pettingill, COMT; Kathryn Pepple, MD, PhD.

**Washington University, St. Louis, MO:** Humeyra Karacal, MD (Director); Eve Adcock; Patricia Arnold; Sarah Gardner; John Greer, COT; Erika Hoehn; Charla Meyer; Greg Rathert; P. Kumar Rao, MD.

**Wills Eye Hospital, Mid Atlantic Retina, Philadelphia, PA:** James P. Dunn, MD (Director); Suely Bascope; Hannah Benfield; Christina Centinaro; Michele Formoso, MD; Sunir Garg, MD; Elaine Gonzales; Lisa Grande; Omesh Gupta, MD, Allen Ho, MD; Jason Hsu, MD; Brianna Kenney; Zafirah Khodabukus; Rachel Magner; Sonia Mehta, MD; Michelle Millard; Lila Ortiz; Carl Park, MD; Marc Spirn, MD.

### **Resource Centers**

**Chairman's Office: Johns Hopkins University Bloomberg School of Public Health, Baltimore, MD:** Douglas A. Jabs, MD, MBA (Chair); John H. Kempen, MD, PhD (Vice-Chair, Protocol Chair for the MUST Trial Follow-up Study); Taylor Binnix. *Former members:* Karen Pascual, MBA; Jill S. Slutsky-Sanon, MPA.

**Coordinating Center, Johns Hopkins University Bloomberg School of Public Health, Baltimore, MD:** Janet T. Holbrook, PhD, MPH (Director); Debra Amend-Libercci; Alyce Burke, MPH; Cathleen Ewing; David S. Friedman, MD, PhD; Andrea Lears, BS; Jill Meinert; Vinnette Morrison, BS; Deborah Nowakowski; Nancy Prusakowski, MS; Dave M. Shade, JD; Jacqueline Smith, AA; Akrit Sodhi, MD, PhD; Elizabeth A. Sugar, PhD; V. Ben Supan; Mark Van Natta, MHS.

**Data and Safety Monitoring Committee:** *Voting members:* Alan G. Palestine, MD (Chair); William E. Barlow, PhD; Alice T. Lyon, MD; David C. Musch, PhD, MPH; Lee S. Simon, MD. *Non-voting members:* Michael M. Altaweel, MD; Sangeeta Bhargava, PhD; Donald Everett, MA; Janet T. Holbrook, PhD, MPH; Douglas A. Jabs, MD, MBA, John H. Kempen, MD, PhD, Elizabeth A. Sugar, PhD. *Former member:* Kim Overby, MD, MBE

**Executive Committee:** Douglas A. Jabs, MD, MBA (Chair); Michael M. Altaweel, MD; Sangeeta Bhargava, PhD; Donald Everett, MA; Janet T. Holbrook, PhD, MPH; John H. Kempen, MD, PhD; Elizabeth E. Sugar, PhD.

**EyeKor:** Nathan Diers; Anne Goulding; Jeremy Lawn

**Statistical Analysis Committee:** Elizabeth A. Sugar, PhD (Chair); Alyce E. Burke, MPH; Lea T. Drye, PhD; Janet T. Holbrook, PhD, MPH; Mark L. Van Natta, MHS.

**University of Wisconsin Fundus Photograph Reading Center, Madison, WI:** Michael M. Altaweel, MD (Director); Amitha Domalpally, MD; Daniel Lawrence, PhD; Susan Reed, BS; Pam Vargo; Hugh Wabers.

**Visual Function Quality Assurance Committee:** Robert D. Almanzor, COA (Chair); Deborah Gibbs, COMT, CCRC; Mary Lew, COT; Nancy Prusakowski, MS; Jennifer E. Thorne, MD, PhD (Advisor)
